# Supplementary material for: Impact of Ultrasonication on the Self-Assembly Behavior and Gel Properties of Bovine Bone Collagen I
Source: MDPI journal article supplement (doi:10.3390/molecules28073096), 2023-03-30
Supplement: s1 [file s1]

## **Supplementary Files (Color should be used for all figures)**

### **Supplementary file S1.**

Table S1 Components of simulated body fluid solution (mM).

### **Supplementary file S2.**

Table S2 SDS-PAGE band intensities of collagen.

### **Supplementary file S3.**

Table S3 Fourier transform-infrared spectra peak wavenumber and assignment of collagen.

### **Supplementary file S4.**

Table S4 Curve-fitting analysis of amide I band of collagen

### **Supplementary file S5.**

Table S5 D values calculated by the Bragg equation of the two x-ray diffraction peaks of collagen.

### **Supplementary file S6.**

Table S6 Thermal analysis of collagen fibril gels under N<sub>2</sub> air atmosphere.

### **Supplementary file S7.**

Table S7 N<sub>2</sub> adsorption analysis of collagen fibril gels.

**Supplementary material S1**

Table S1   Components of simulated body fluid solution (mM).

| NaCl  | NaHCO <sub>3</sub> | KCl | K <sub>2</sub> HPO <sub>4</sub> •3H <sub>2</sub> O | CaCl <sub>2</sub> | Na <sub>2</sub> SO <sub>4</sub> | MgCl <sub>2</sub> •6H <sub>2</sub> O | Tris |
|-------|--------------------|-----|----------------------------------------------------|-------------------|---------------------------------|--------------------------------------|------|
| 1 370 | 42                 | 30  | 10                                                 | 25                | 5                               | 15                                   | 300  |

## Supplementary material S2

Table S2 SDS-PAGE band intensities of collagen

| Samples  | Bands            | Band intensities |                    |                       |                   |                   | Raw density | $\alpha 1/\alpha 2$<br>Ratio |
|----------|------------------|------------------|--------------------|-----------------------|-------------------|-------------------|-------------|------------------------------|
|          |                  | Area             | Mean gray<br>value | Standard<br>deviation | Min gray<br>value | Max gray<br>value |             |                              |
| C0W0m    | Lane             | -                | -                  | -                     | -                 | -                 | 5584852     | 2.032                        |
|          | $\gamma$ -band   | 7446             | 109.912            | 6.591                 | 90                | 135               | 818463      |                              |
|          | $\beta$ -band    | 17920            | 94.155             | 7.222                 | 80                | 123               | 1687258     |                              |
|          | $\alpha 1$ -band | 23808            | 86.676             | 17.487                | 61                | 138               | 2063586     |                              |
|          | $\alpha 2$ -band | 10096            | 100.591            | 8.893                 | 83                | 131               | 1015545     |                              |
| C50W10m  | Lane             | -                | -                  | -                     | -                 | -                 | 5063284     | 2.037                        |
|          | $\gamma$ -band   | 7632             | 106.787            | 5.164                 | 91                | 127               | 815002      |                              |
|          | $\beta$ -band    | 15232            | 91.593             | 5.878                 | 80                | 121               | 1395139     |                              |
|          | $\alpha 1$ -band | 23217            | 82.428             | 16.085                | 59                | 126               | 1913682     |                              |
|          | $\alpha 2$ -band | 9225             | 101.851            | 8.672                 | 85                | 129               | 939461      |                              |
| C100W10m | Lane             | -                | -                  | -                     | -                 | -                 | 4598648     | 2.055                        |
|          | $\gamma$ -band   | 8272             | 97.462             | 6.535                 | 85                | 126               | 806208      |                              |
|          | $\beta$ -band    | 13600            | 90.896             | 6.523                 | 75                | 116               | 1236182     |                              |
|          | $\alpha 1$ -band | 20064            | 85.701             | 17.172                | 61                | 127               | 1719512     |                              |
|          | $\alpha 2$ -band | 8348             | 99.168             | 10.446                | 82                | 130               | 836746      |                              |
| C200W10m | Lane             | -                | -                  | -                     | -                 | -                 | 6113291     | 2.021                        |
|          | $\gamma$ -band   | 6476             | 116.124            | 7.306                 | 94                | 139               | 751948      |                              |
|          | $\beta$ -band    | 17136            | 93.566             | 7.390                 | 80                | 119               | 1603342     |                              |
|          | $\alpha 1$ -band | 28400            | 88.508             | 18.926                | 61                | 134               | 2513630     |                              |
|          | $\alpha 2$ -band | 11576            | 107.492            | 8.890                 | 85                | 136               | 1244371     |                              |
| C400W10m | Lane             | -                | -                  | -                     | -                 | -                 | 5102817     | 1.963                        |
|          | $\gamma$ -band   | 5088             | 106.761            | 6.941                 | 89                | 123               | 543198      |                              |
|          | $\beta$ -band    | 14336            | 98.796             | 7.678                 | 80                | 119               | 1416341     |                              |
|          | $\alpha 1$ -band | 23552            | 88.419             | 17.799                | 61                | 131               | 2082435     |                              |
|          | $\alpha 2$ -band | 9904             | 107.115            | 9.393                 | 81                | 136               | 1060843     |                              |
| C200W5m  | Lane             | -                | -                  | -                     | -                 | -                 | 5052256     | 2.019                        |
|          | $\gamma$ -band   | 8001             | 106.928            | 6.616                 | 90                | 137               | 855427      |                              |
|          | $\beta$ -band    | 13872            | 92.667             | 6.608                 | 80                | 112               | 1285483     |                              |
|          | $\alpha 1$ -band | 24165            | 80.573             | 16.321                | 56                | 132               | 1947005     |                              |
|          | $\alpha 2$ -band | 8956             | 107.687            | 8.777                 | 85                | 136               | 964341      |                              |
| C200W15m | Lane             | -                | -                  | -                     | -                 | -                 | 4769901     | 2.028                        |
|          | $\gamma$ -band   | 6528             | 98.923             | 5.156                 | 84                | 113               | 645770      |                              |
|          | $\beta$ -band    | 15232            | 92.767             | 6.658                 | 82                | 118               | 1413032     |                              |
|          | $\alpha 1$ -band | 22943            | 79.142             | 16.528                | 55                | 121               | 1815756     |                              |
|          | $\alpha 2$ -band | 8781             | 101.969            | 10.054                | 83                | 126               | 895343      |                              |
| C200W30m | Lane             | -                | -                  | -                     | -                 | -                 | 4745278     | 2.006                        |
|          | $\gamma$ -band   | 6022             | 100.980            | 8.352                 | 87                | 134               | 608050      |                              |
|          | $\beta$ -band    | 11089            | 91.693             | 7.187                 | 70                | 116               | 1016727     |                              |
|          | $\alpha 1$ -band | 24192            | 86.078             | 15.557                | 61                | 125               | 2082410     |                              |

|          |                  |       |         |        |    |     |         |       |
|----------|------------------|-------|---------|--------|----|-----|---------|-------|
|          | $\alpha 2$ -band | 10400 | 99.819  | 7.957  | 84 | 121 | 1038091 |       |
|          | Lane             | -     | -       | -      | -  | -   | 4770263 |       |
|          | $\gamma$ -band   | 5358  | 109.396 | 15.584 | 81 | 182 | 586131  |       |
| C200W60m | $\beta$ -band    | 9803  | 102.820 | 9.649  | 80 | 140 | 1007875 | 1.983 |
|          | $\alpha 1$ -band | 23232 | 90.886  | 17.466 | 65 | 161 | 2111471 |       |
|          | $\alpha 2$ -band | 10013 | 106.336 | 19.079 | 79 | 167 | 1064786 |       |

Lane, the overall intensities of  $\gamma$ -band,  $\beta$ -band,  $\alpha 1$ -band, and  $\alpha 2$ -band.

## Supplementary material S3

Table S3 Fourier transform-infrared spectra peak wavenumber and assignment of collagen

| Region                              | Wavenumber (cm <sup>-1</sup> ) |        |        |        |        |        |        |        |        | Assignment                                              |
|-------------------------------------|--------------------------------|--------|--------|--------|--------|--------|--------|--------|--------|---------------------------------------------------------|
|                                     | 1                              | 2      | 3      | 4      | 5      | 6      | 7      | 8      | 9      |                                                         |
| Amide A                             | 3298                           | 3292   | 3292   | 3294   | 3298   | 3294   | 3307   | 3325   | 3325   | N-H stretch coupled with hydrogen bonding               |
| Amide B                             | 2922                           | 2924   | 2926   | 2934   | 2928   | 2924   | 2926   | 2932   | 2932   | CH <sub>3</sub> -asymmetric stretch                     |
|                                     | 2853                           | 2853   | 2855   | 2880   | 2874   | 2852   | 2876   | 2876   | 2876   | CH <sub>2</sub> symmetric and asymmetric stretch        |
| Amide I                             | 1661                           | 1661   | 1653   | 1651   | 1655   | 1651   | 1649   | 1649   | 1634   | C=O stretch/hydrogen bond coupled with COO <sup>-</sup> |
| Amide II                            | 1518                           | 1531   | 1547   | 1553   | 1541   | 1533   | 1551   | 1520   | 1535   | N-H bend coupled with C-N stretch                       |
|                                     | 1454                           | 1454   | 1452   | 1454   | 1452   | 1452   | 1452   | 1449   | 1449   | CH <sub>2</sub> bend                                    |
|                                     | 1389                           | 1389   | 1402   | 1404   | 1394   | 1391   | 1402   | 1389   | 1387   | COO <sup>-</sup> symmetric stretch                      |
|                                     | 1344                           | 1342   | 1337   | 1339   | /      | 1344   | 1338   | 1342   | 1342   | CH <sub>2</sub> wag                                     |
|                                     | 1230                           | 1234   | 1238   | 1240   | 1240   | 1234   | 1238   | 1230   | 1236   | N-H bend coupled with C-N stretch                       |
| Amide III                           | 1173                           | 1173   | 1165   | 1163   | 1171   | 1175   | 1161   | 1159   | 1159   | C–O stretch/C–N–C stretch                               |
|                                     | 1078                           | 1076   | 1082   | 1082   | /      | 1072   | 1080   | 1070   | 1069   | Skeletal stretch                                        |
| A <sub>III</sub> /A <sub>1450</sub> | 1.1299                         | 1.0841 | 1.1044 | 1.0575 | 1.0776 | 1.1301 | 1.0487 | 1.0855 | 1.0880 | Integrity of triple helix structure                     |

/: no peak. 1: C0W0m; 2: C50W10m; 3: C100W10m; 4: C200W10m; 5: C400W10m; 6: C200W5m; 7: C200W15m; 8: C200W30m; 2: C200W60m

Supplementary material S4

Table S4    Curve-fitting analysis of amide I band of collagen

| Secondary structure               | Ultrasonic/non-ultrasonic treatment collagen |         |          |          |          |         |          |          |          |
|-----------------------------------|----------------------------------------------|---------|----------|----------|----------|---------|----------|----------|----------|
|                                   | C0W0m                                        | C50W10m | C100W10m | C200W10m | C400W10m | C200W5m | C200W15m | C200W30m | C200W60m |
| From fitting by Gaussian equation |                                              |         |          |          |          |         |          |          |          |
| $\alpha$ -helices                 | 58.35%                                       | 44.26%  | 36.75%   | 35.40%   | 42.58%   | 36.81%  | 20.50%   | 18.22%   | 16.11%   |
| $\beta$ -sheets                   | 34.92%                                       | 42.59%  | 36.82%   | 29.95%   | 23.06%   | 31.15%  | 39.99%   | 38.74%   | 42.55%   |
| $\beta$ -turns                    | 6.73%                                        | 13.13%  | 26.32%   | 31.26%   | 18.66%   | 22.10%  | 29.81%   | 33.18%   | 23.62%   |
| random coils                      | 0.00%                                        | 0.02%   | 0.11%    | 3.39%    | 15.70%   | 9.94%   | 9.71%    | 9.86%    | 17.72%   |

Supplementary material S5

Table S5 D values calculated by the Bragg equation of the two x-ray diffraction peaks of collagen

| Diffraction peaks       | Ultrasonic/non-ultrasonic treatment collagen |         |          |          |          |         |          |          |          |
|-------------------------|----------------------------------------------|---------|----------|----------|----------|---------|----------|----------|----------|
|                         | C0W0m                                        | C50W10m | C100W10m | C200W10m | C400W10m | C200W5m | C200W15m | C200W30m | C200W60m |
| Diffraction angle 1 (°) | 8.12                                         | 7.98    | 7.92     | 7.70     | 7.66     | 8.06    | 7.96     | 7.56     | 7.52     |
| d1 (nm)                 | 1.088                                        | 1.107   | 1.115    | 1.147    | 1.152    | 1.096   | 1.109    | 1.168    | 1.174    |
| Diffraction angle 2 (°) | 20.86                                        | 19.94   | 19.76    | 19.66    | 20.84    | 20.10   | 19.90    | 19.62    | 20.32    |
| d2 (nm)                 | 0.425                                        | 0.445   | 0.449    | 0.451    | 0.426    | 0.441   | 0.446    | 0.452    | 0.437    |

Supplementary material S6

Table S6 Thermal analysis of collagen fibril gels under N<sub>2</sub> air atmosphere

| Temperature (°C) | Ultrasonic/non-ultrasonic treatment collagen |         |          |          |          |         |          |          |          |
|------------------|----------------------------------------------|---------|----------|----------|----------|---------|----------|----------|----------|
|                  | C0W0m                                        | C50W10m | C100W10m | C200W10m | C400W10m | C200W5m | C200W15m | C200W30m | C200W60m |
| Weight loss (%)  |                                              |         |          |          |          |         |          |          |          |
| 100              | 11.45                                        | 11.59   | 7.61     | 10.28    | 4.84     | 11.44   | 13.67    | 10.11    | 14.05    |
| 200              | 13.17                                        | 13.61   | 10.63    | 18.16    | 6.26     | 13.67   | 16.45    | 11.96    | 16.18    |
| 300              | 32.21                                        | 30.01   | 25.41    | 20.66    | 25.51    | 30.68   | 34.63    | 30.46    | 32.20    |
| 400              | 61.55                                        | 61.11   | 60.04    | 56.95    | 56.54    | 61.01   | 69.63    | 58.98    | 65.13    |
| 500              | 74.02                                        | 70.83   | 67.48    | 88.83    | 69.14    | 70.88   | 77.34    | 70.69    | 72.73    |
| 600              | 94.35                                        | 90.13   | 82.13    | 96.22    | 87.81    | 90.09   | 90.13    | 97.74    | 81.05    |
| 700              | 99.99                                        | 99.99   | 99.99    | 99.99    | 99.73    | 99.99   | 99.99    | 99.99    | 96.45    |



Supplementary material S7

Table S7 N<sub>2</sub> adsorption analysis of collagen fibril gels

|                                           | C0W0m  | C50W10m | C100W10m | C200W10m | C400W10m | C200W5m | C200W15m | C200W30m | C200W60m |
|-------------------------------------------|--------|---------|----------|----------|----------|---------|----------|----------|----------|
| BET surface area<br>(m <sup>2</sup> /g)   | 1.380  | 1.401   | 1.417    | 1.644    | 3.179    | 1.529   | 2.381    | 6.801    | 12.013   |
| Total pore volume<br>(cm <sup>3</sup> /g) | 0.0064 | 0.0079  | 0.0069   | 0.0069   | 0.0166   | 0.0099  | 0.0117   | 0.0411   | 0.0318   |
| Average pore<br>diameter (nm)             | 18.552 | 22.466  | 19.407   | 16.916   | 20.878   | 25.917  | 19.724   | 24.194   | 10.581   |
